# Supplementary material
Source: Springer Nature journal article supplement (https://www.springermedizin.de/resource/supplementary/12914_2009_76_MOESM4_ESM.pdf/9537462)
Supplement: MOESM4 [file 9537462]

## Funding 2004 to 2008 by source Ghana cedi millions (nominal)

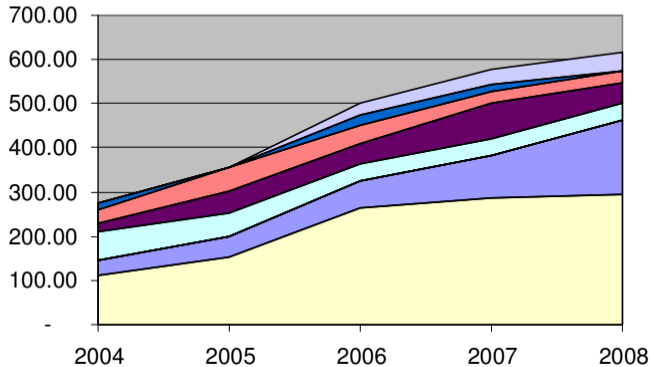

- NHIS transfers at national level to MoH
- HIPC Fund
- Financial Credits
- MOH Programmes
- Health Fund/Sector budget support
- Interest/Other
- Total IGF (user fees + NHIS)
- Govt Ghana subsidy
